# Supplementary material
Source: PubMed Central journal article supplement (PMC3758123)
Supplement: NIHMS333373-supplement-01.pdf [file NIHMS333373-supplement-01.pdf]

# Supplemental Figures

**Yang et al**

**Supplemental Table S1. Statistical analysis of surviving fractions**

| <b>Dose</b> | <b>Groups</b>       | <b>P value</b> |
|-------------|---------------------|----------------|
| 2Gy         | BUB1-5si VS CONTROL | 0.019934       |
|             | BUB1-6si VS CONTROL | 0.049021       |
| 4Gy         | BUB1-5si VS CONTROL | 0.000494       |
|             | BUB1-6si VS CONTROL | 0.004088       |
| 6Gy         | BUB1-5si VS CONTROL | 0.002536       |
|             | BUB1-6si VS CONTROL | 0.00439        |

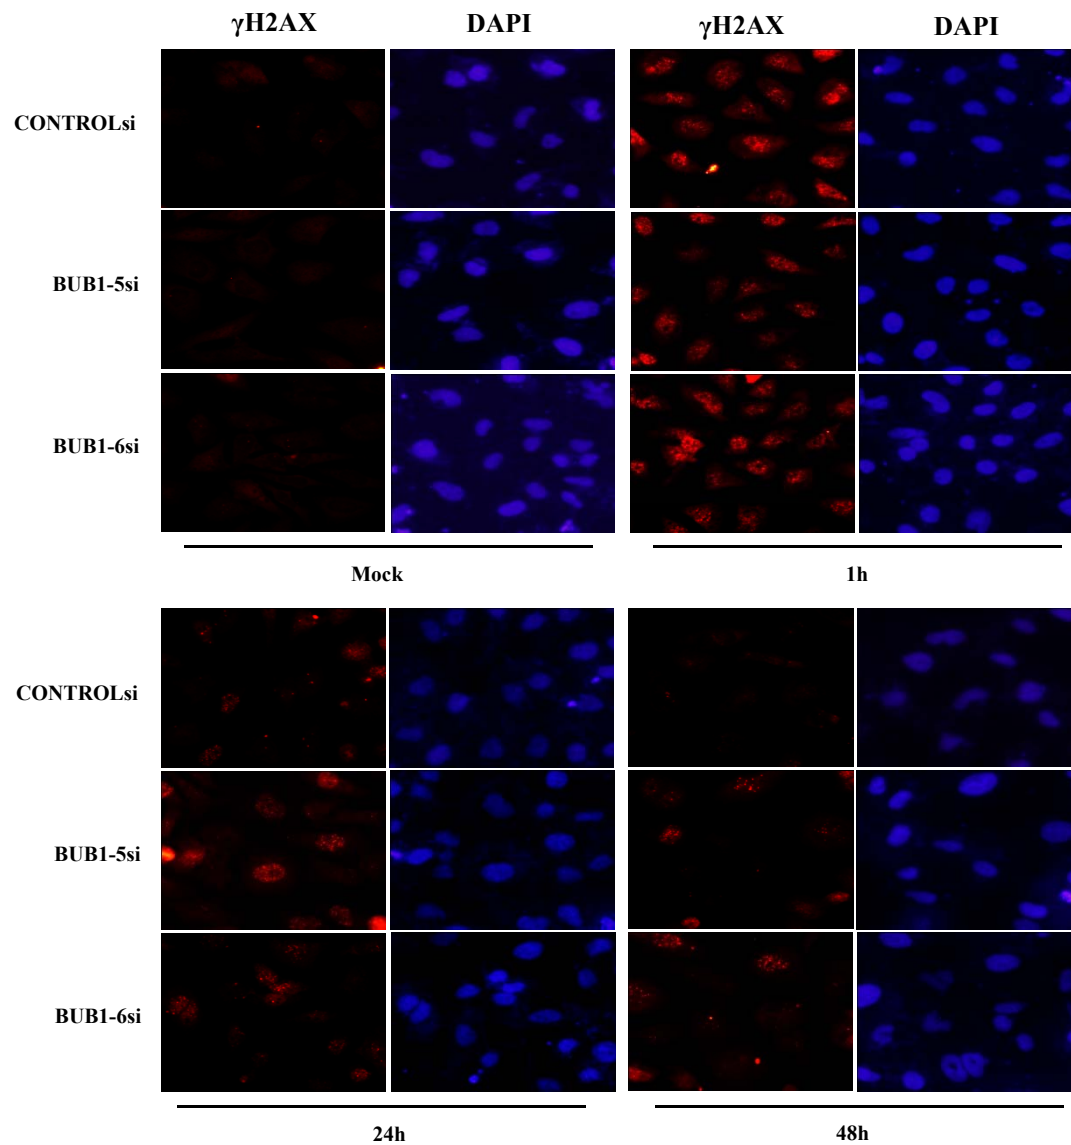

**Supplemental Figure S1.** HeLa cells transfected with control or Bub1 siRNA were irradiated with 0 (Mock) or 4 Gy (IR), and harvested at indicated points before immunofluorescence microscopy was used to detect radiation-induced  $\gamma$ -H2AX foci.

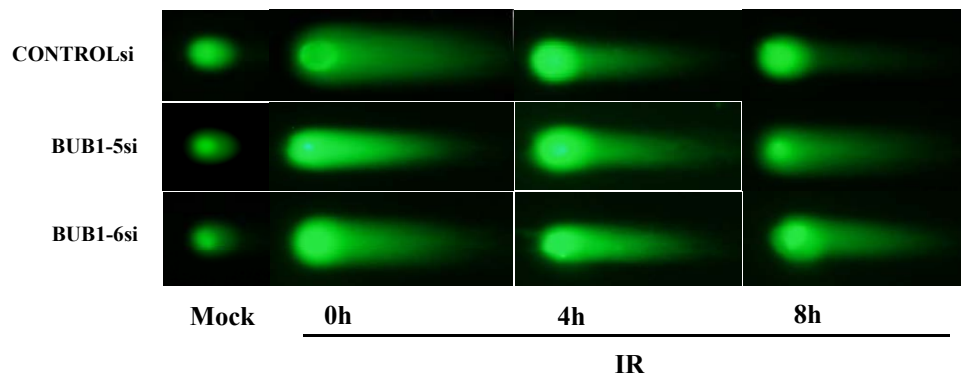

Supplemental Figure S2. The single cell electrophoresis assay in HeLa cells transfected with control or Bub1 siRNAs.

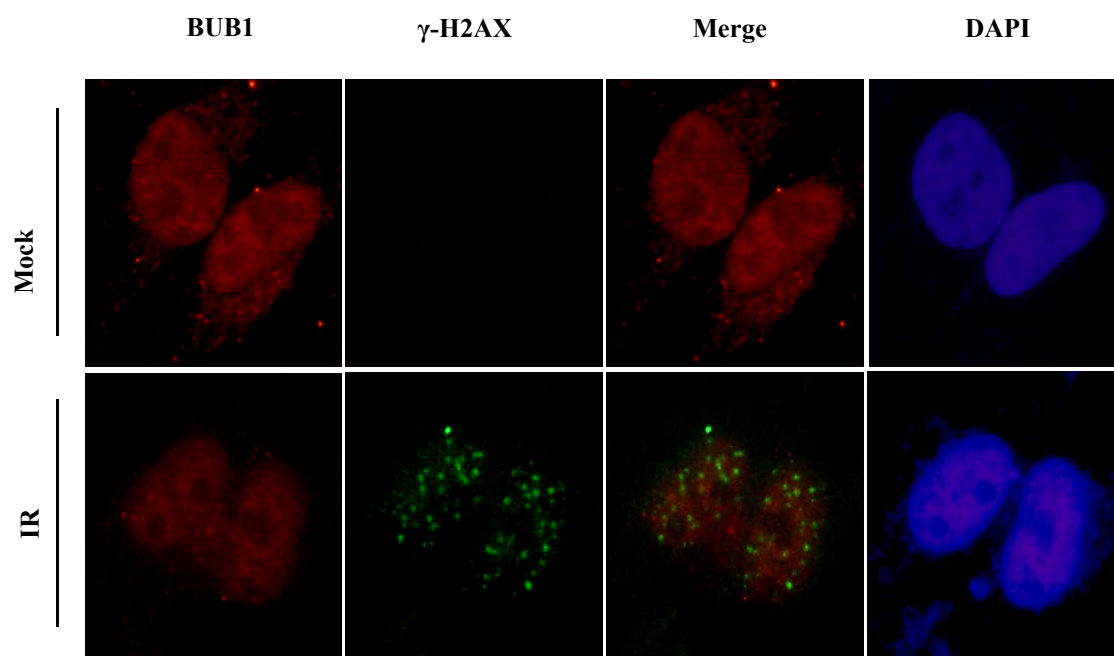

**Supplemental Figure S3. Localization of Bub1 in the absence or presence of IR-induced DNA damage.** HeLa cells were treated with mock or IR (4Gy). 2h after treatment cells were stained with indicated antibodies and images from immunofluorescence microscopy are shown.

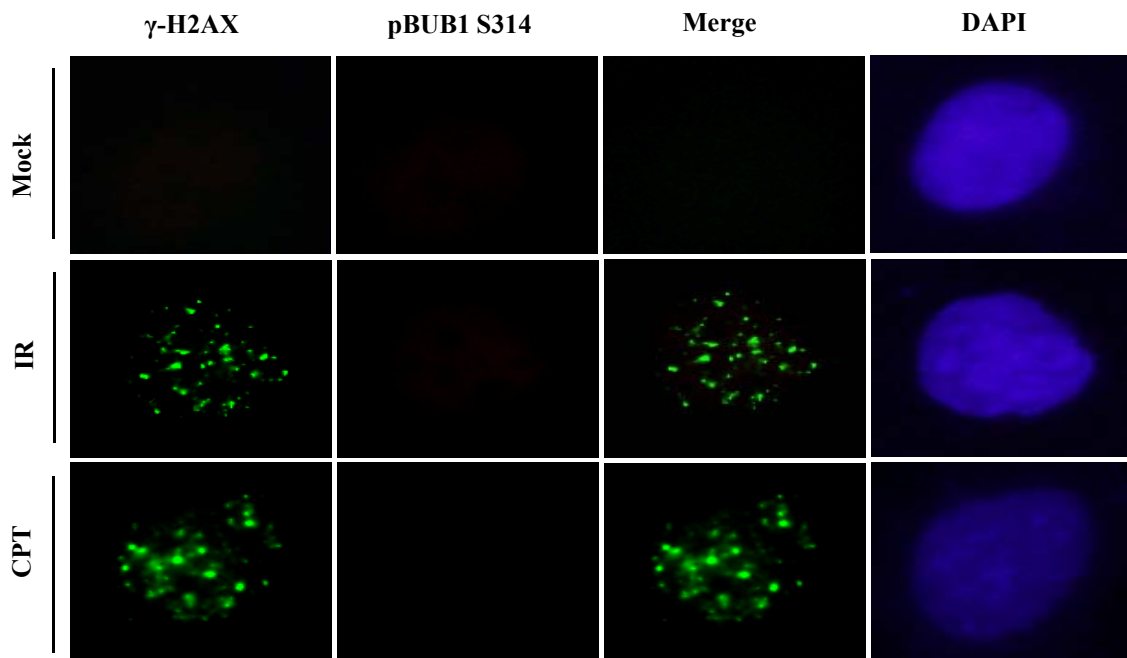

**Bub1 Knock-down**

**Supplemental Figure S4.** HeLa cells transfected with siRNA-Bub1 were treated with mock, IR or CPT. 2h after treatment cells were stained with indicated antibodies and images from immunofluorescence microscopy are shown.

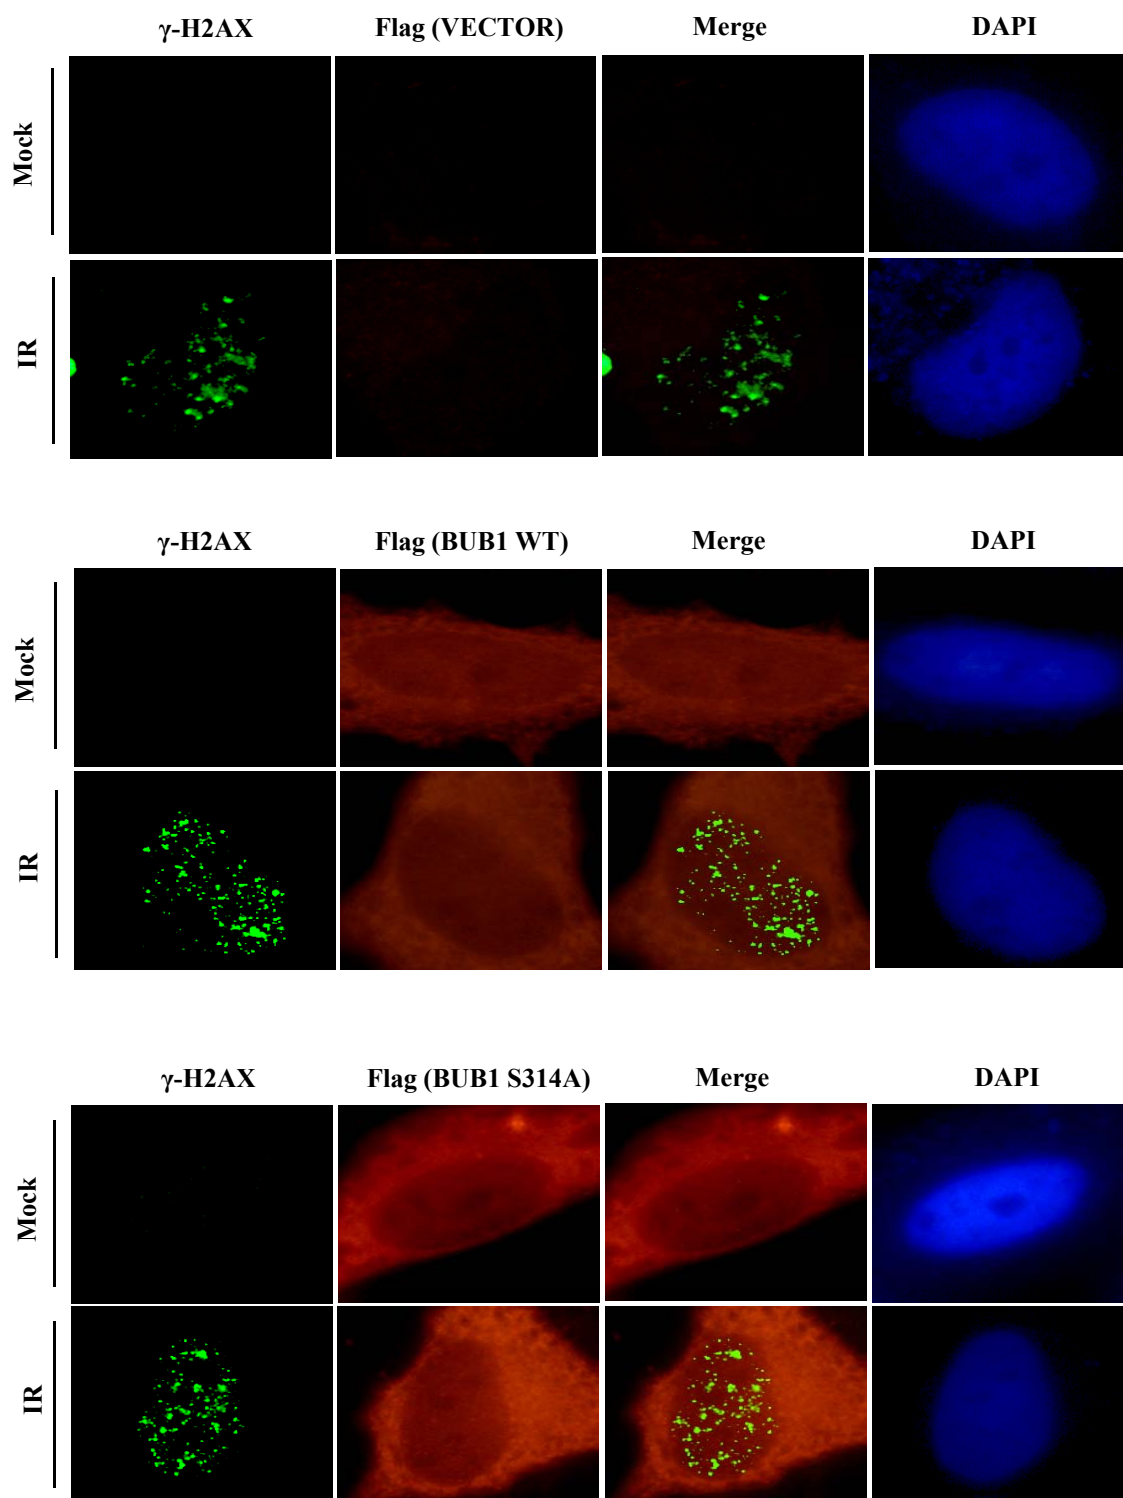

**Supplemental Figure S5. Localization of S314A Bub1 in the absence and presence of IR-induced DNA damage.** HeLa cells transfected with vector or flag-tagged wild-type or S314A Bub1 were treated with mock or IR (4Gy). 2h after treatment cells were stained with indicated antibodies and images from immunofluorescence microscopy are shown.
